# Supplementary material for: Para toluenesulfonic acid-catalyzed one-pot, three-component synthesis of benzo[5,6]chromeno[3,2- c ]quinoline compounds in aqueous medium
Source: publisher site journal article supplement (doi:10.1515/hc-2020-0128), 2021-01-01
Supplement: Supplementary file 1 [file hc-2020-0128_sm.pdf]

## Supplementary material

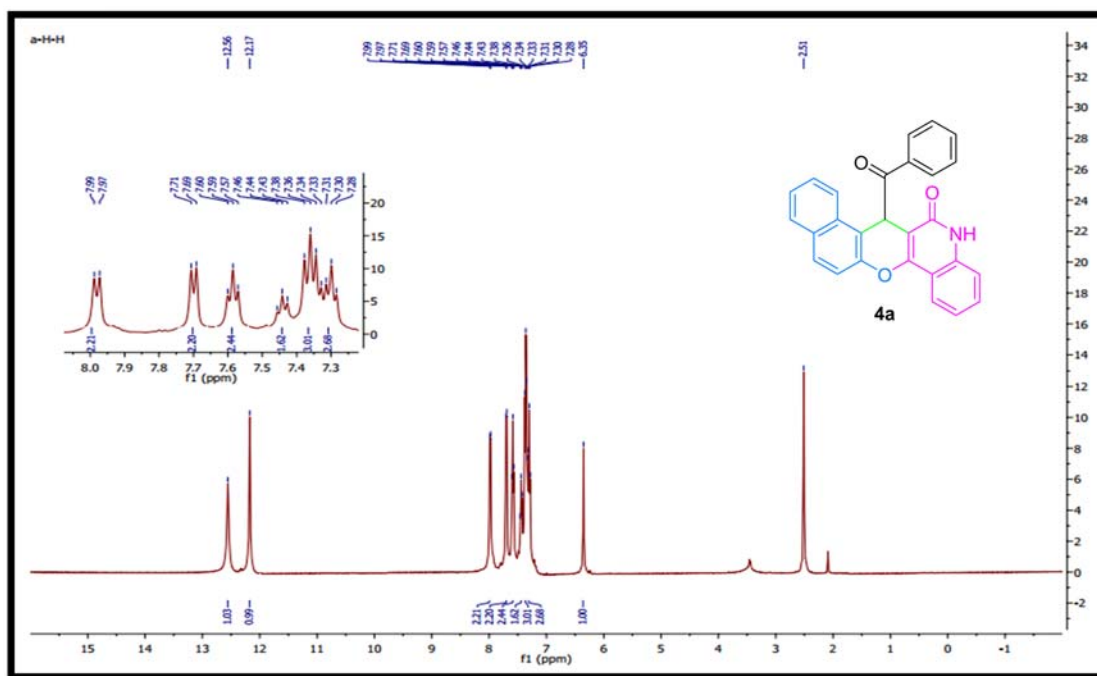

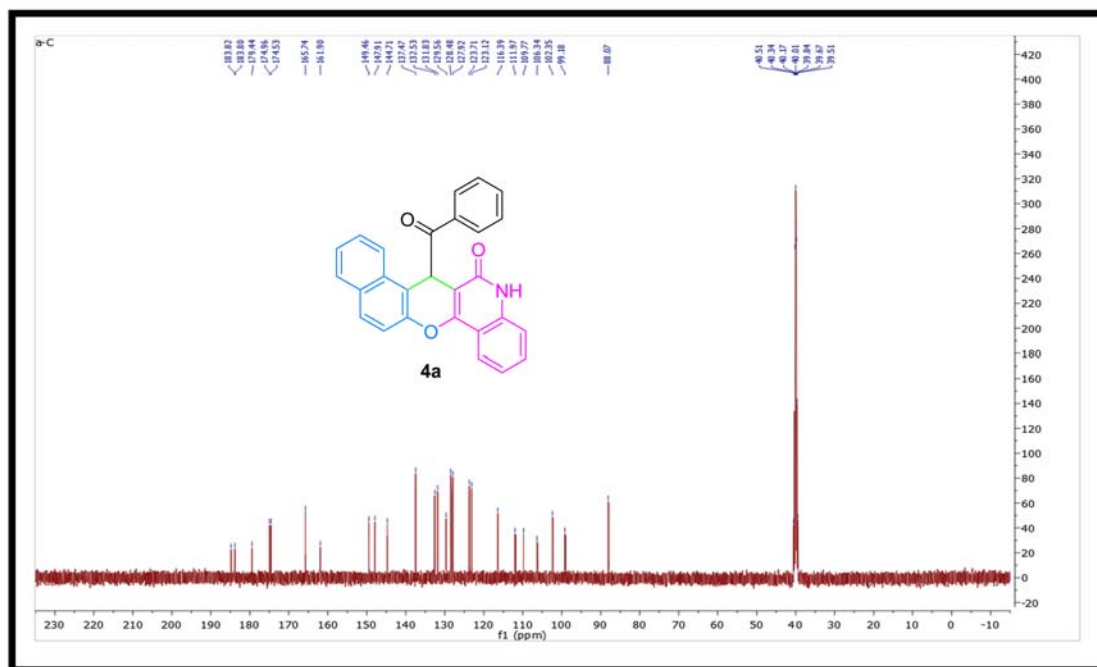Figure S2:  $^{13}\text{C}$  NMR spectrum of compound 4a.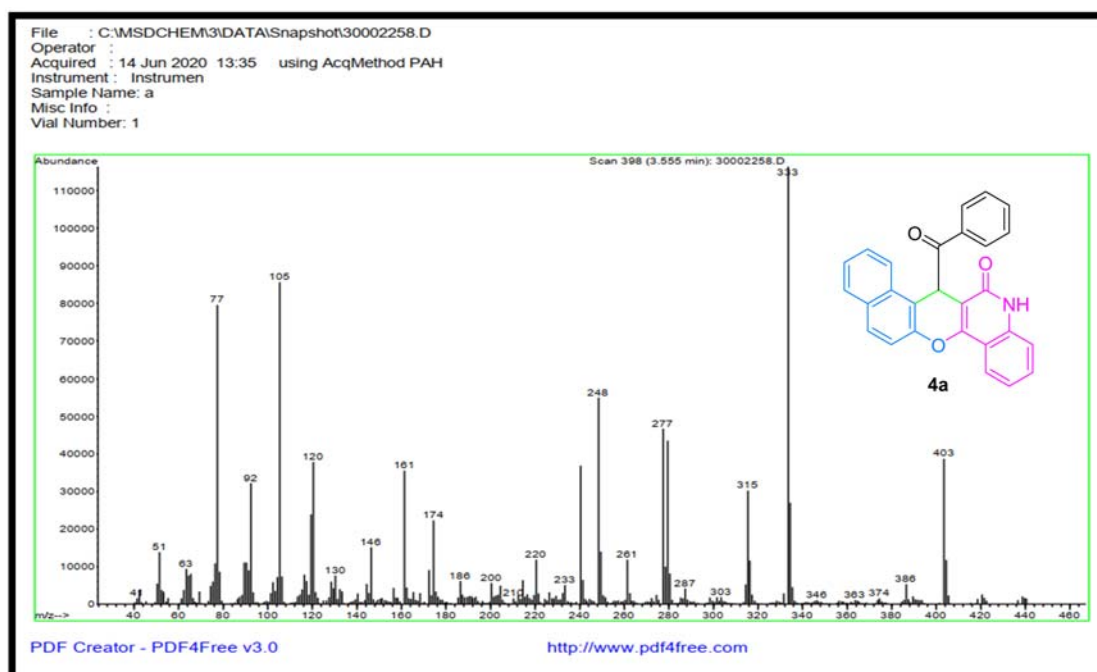

Figure S3: Mass spectrum of compound 4a.

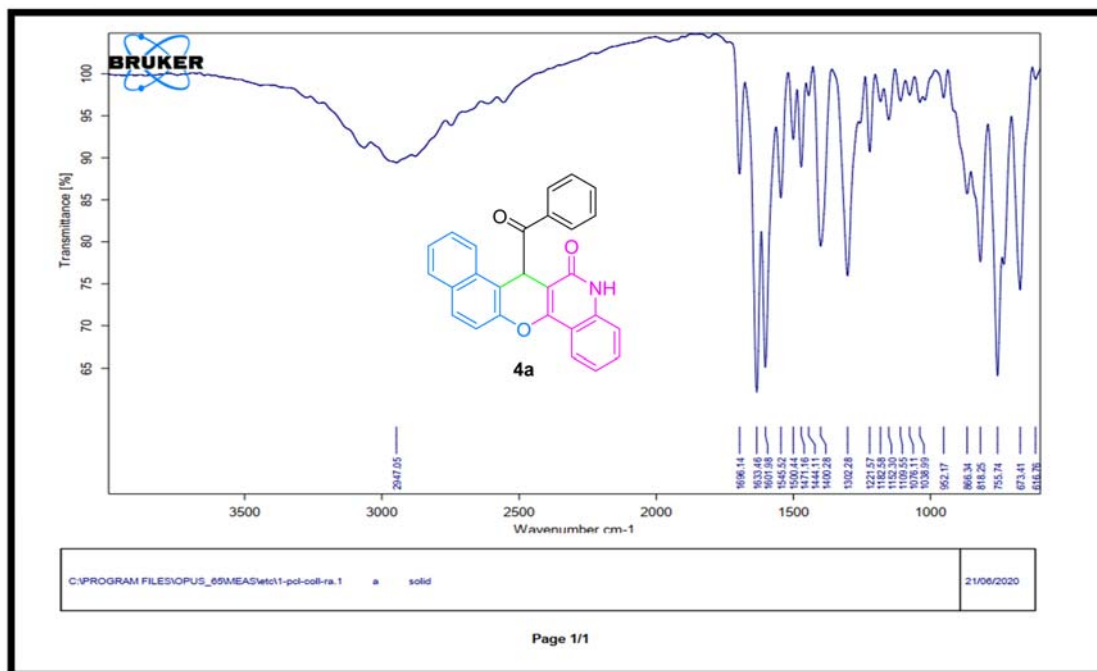

Figure S4: IR spectrum of compound 4a.

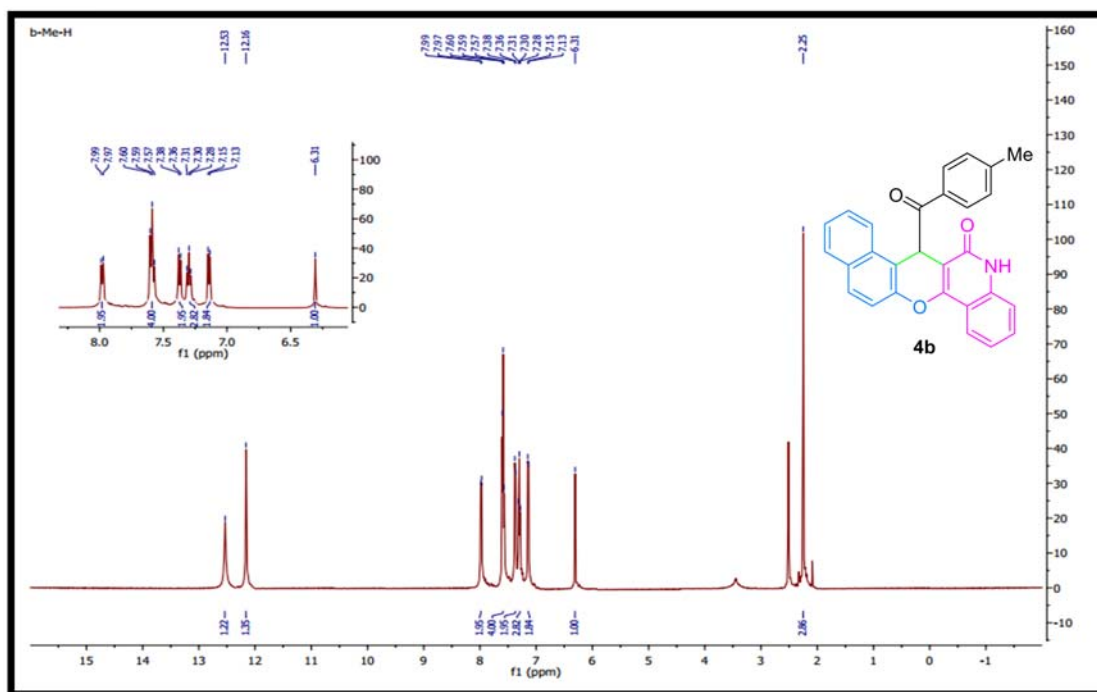Figure S5: <sup>1</sup>H NMR spectrum of compound 4b.

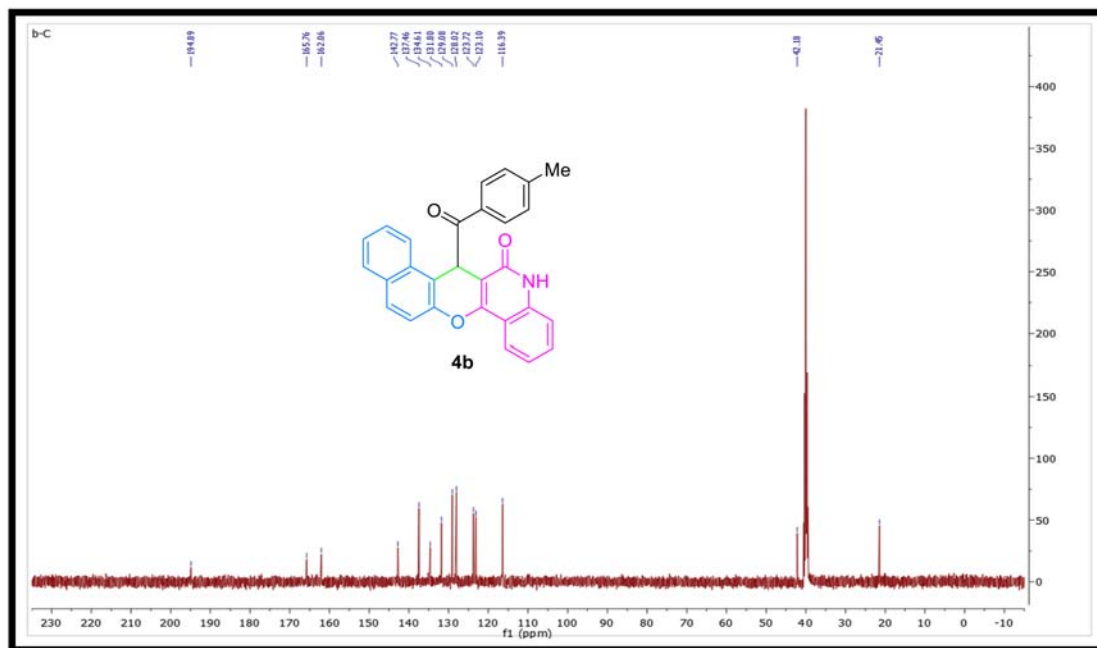Figure S6:  $^{13}\text{C}$  NMR spectrum of compound **4b**.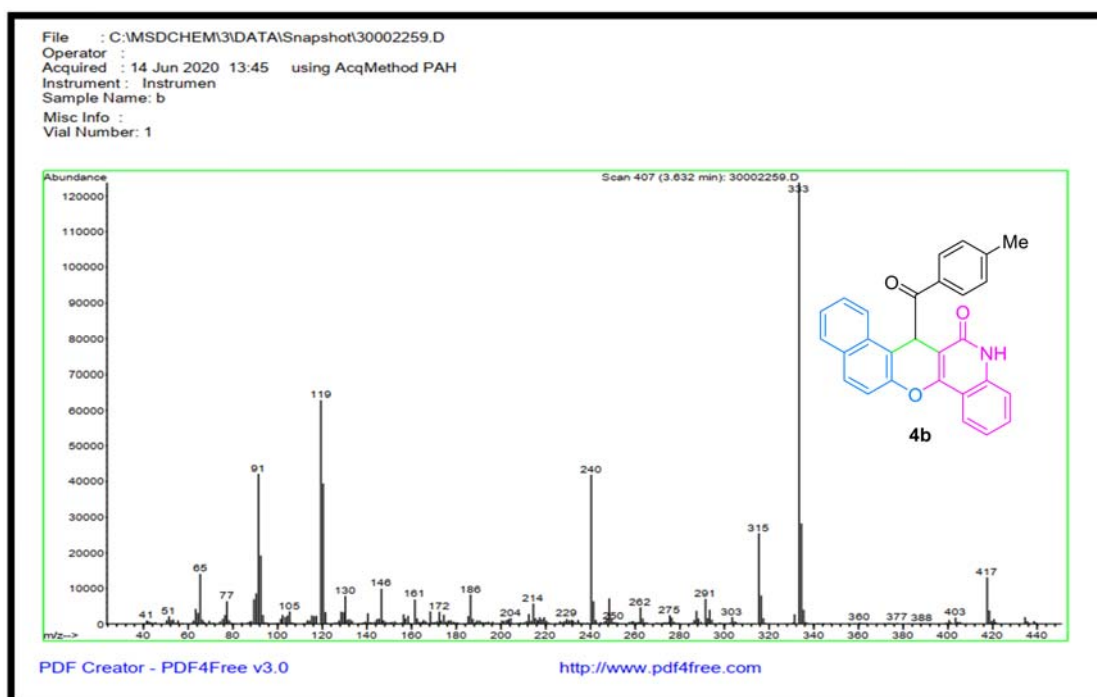Figure S7: Mass spectrum of compound **4b**.

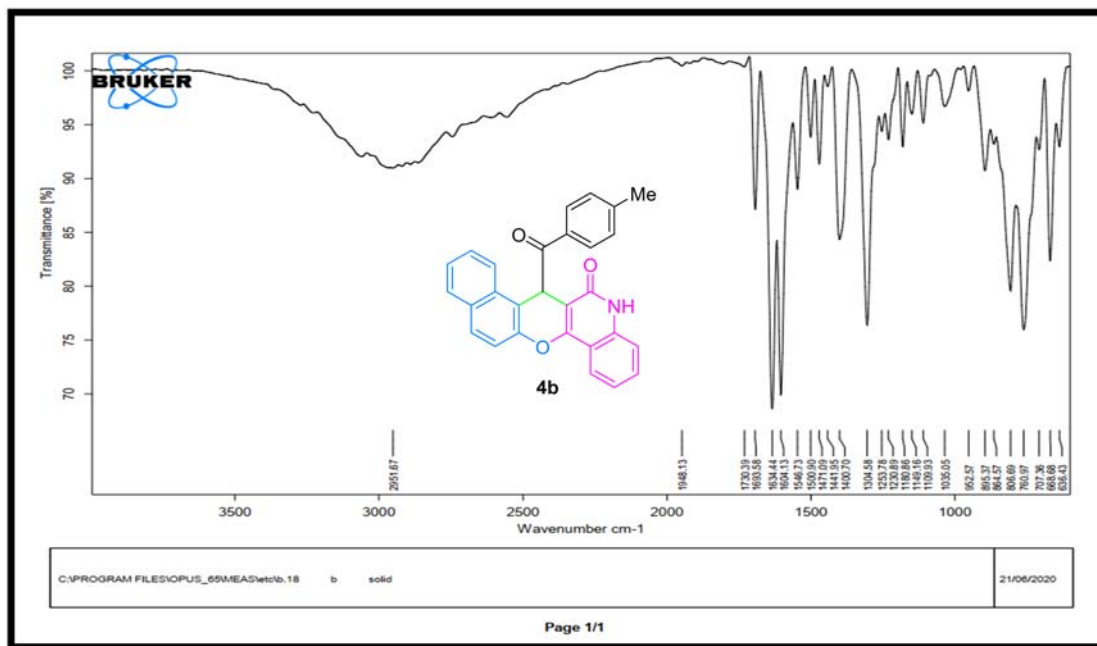

Figure S8: IR spectrum of compound 4b.

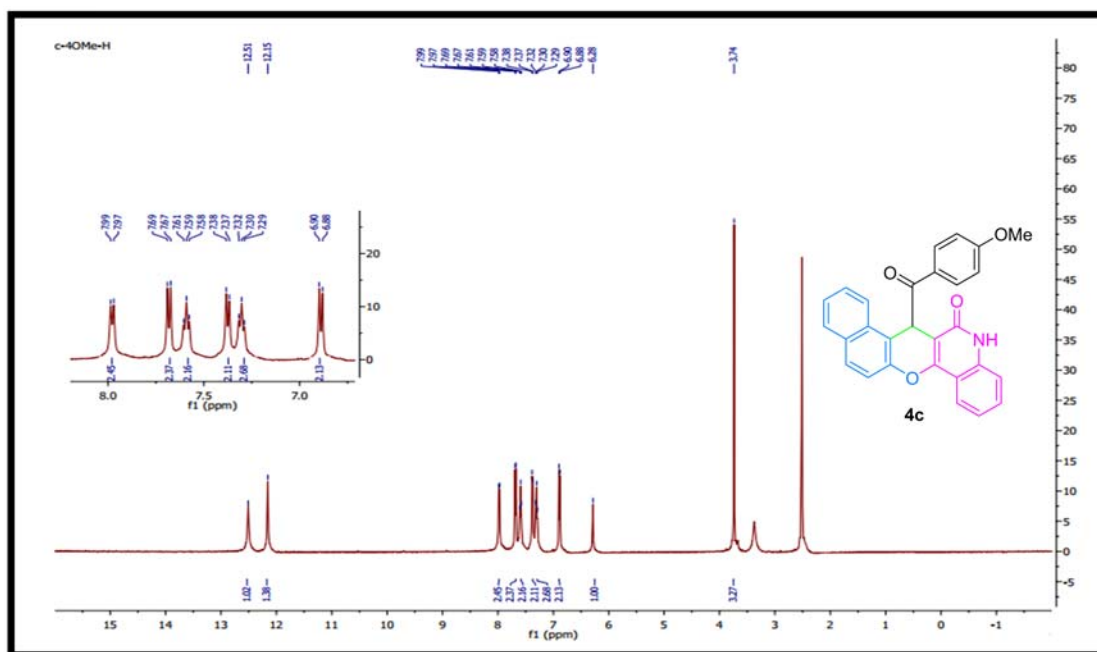Figure S9: <sup>1</sup>H NMR spectrum of compound 4c.

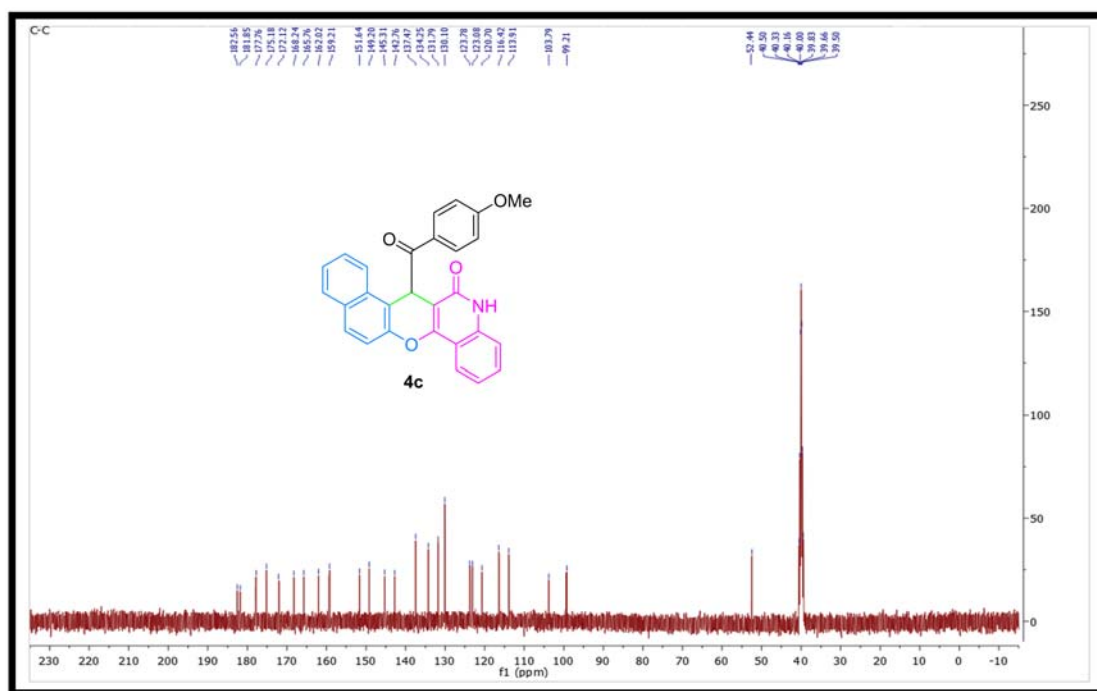

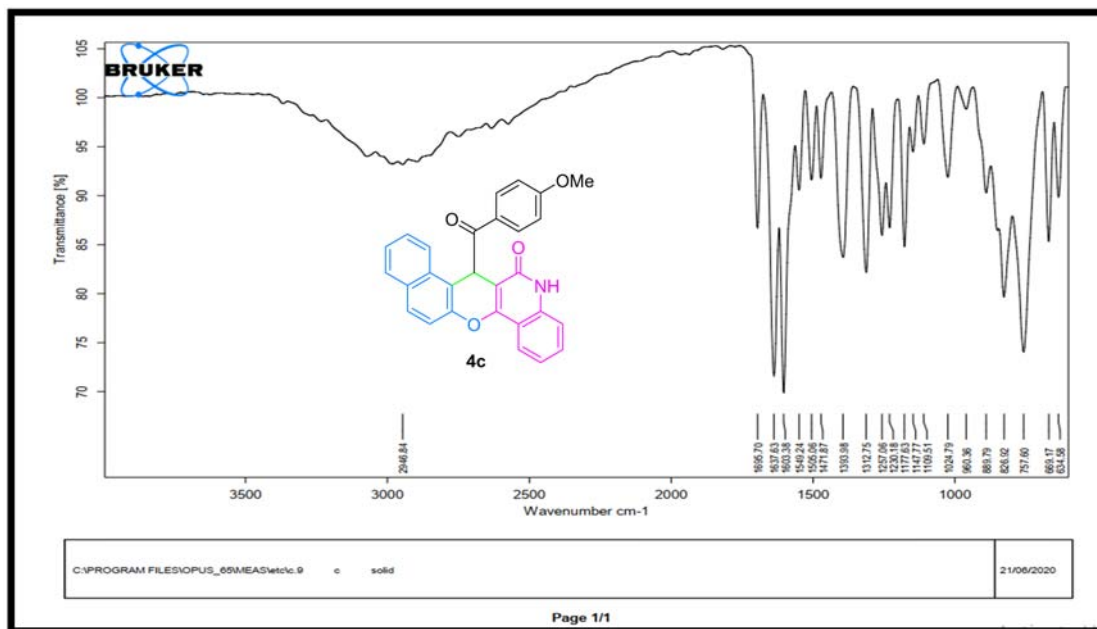

Figure S12: IR spectrum of compound 4c.

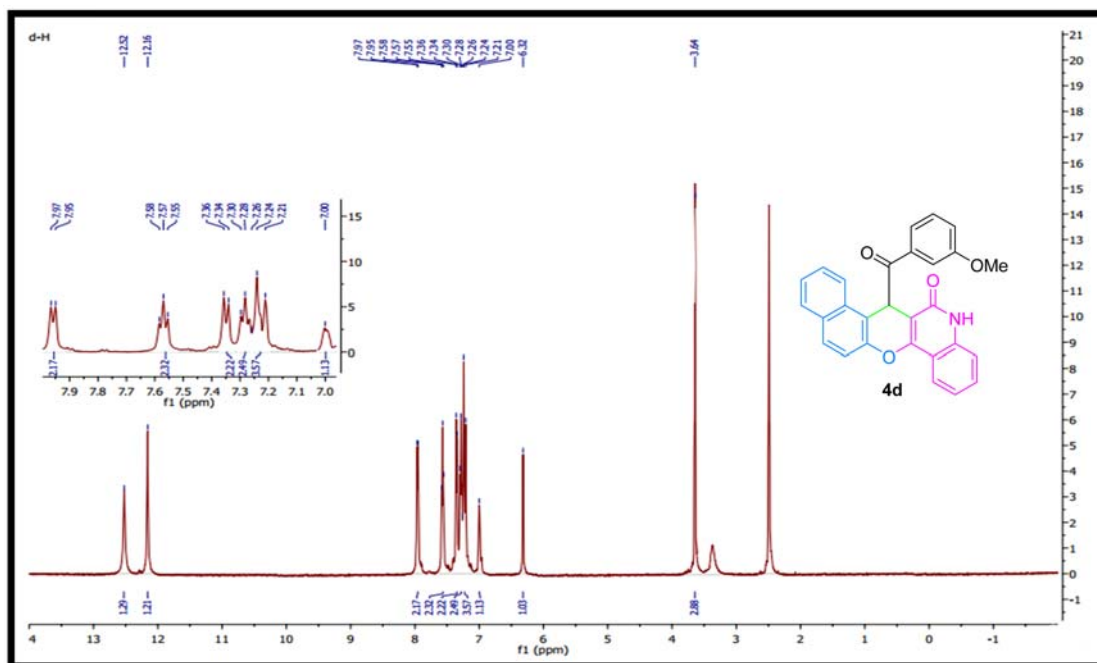Figure S13: <sup>1</sup>H NMR spectrum of compound 4d.

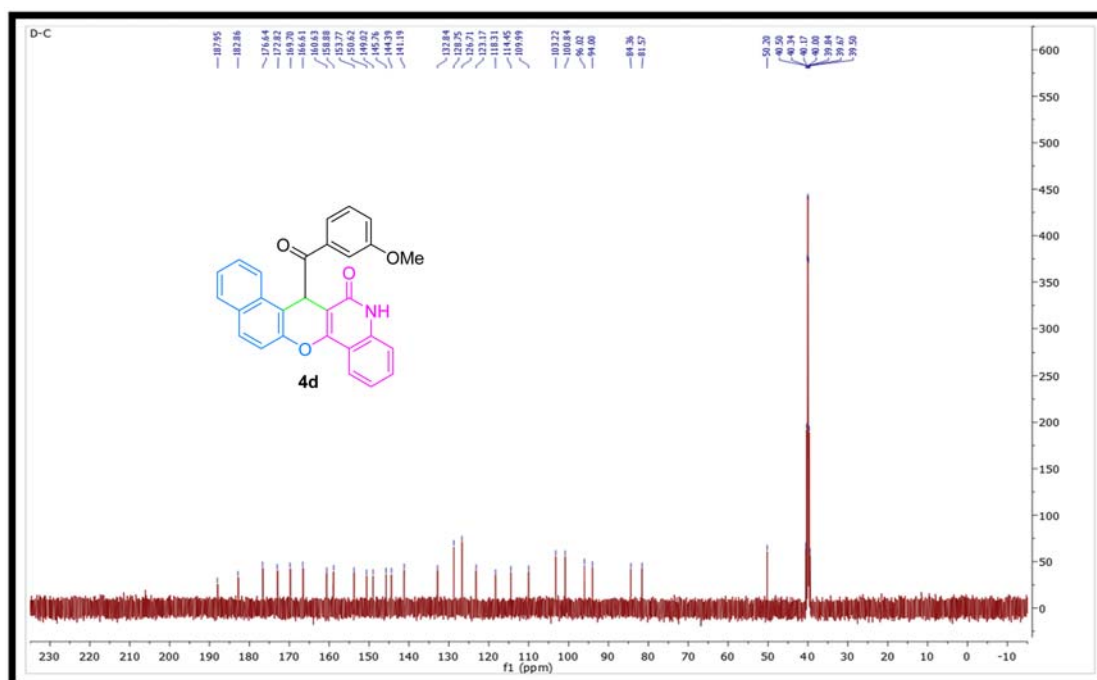Figure S14: <sup>13</sup>C NMR spectrum of compound 4d.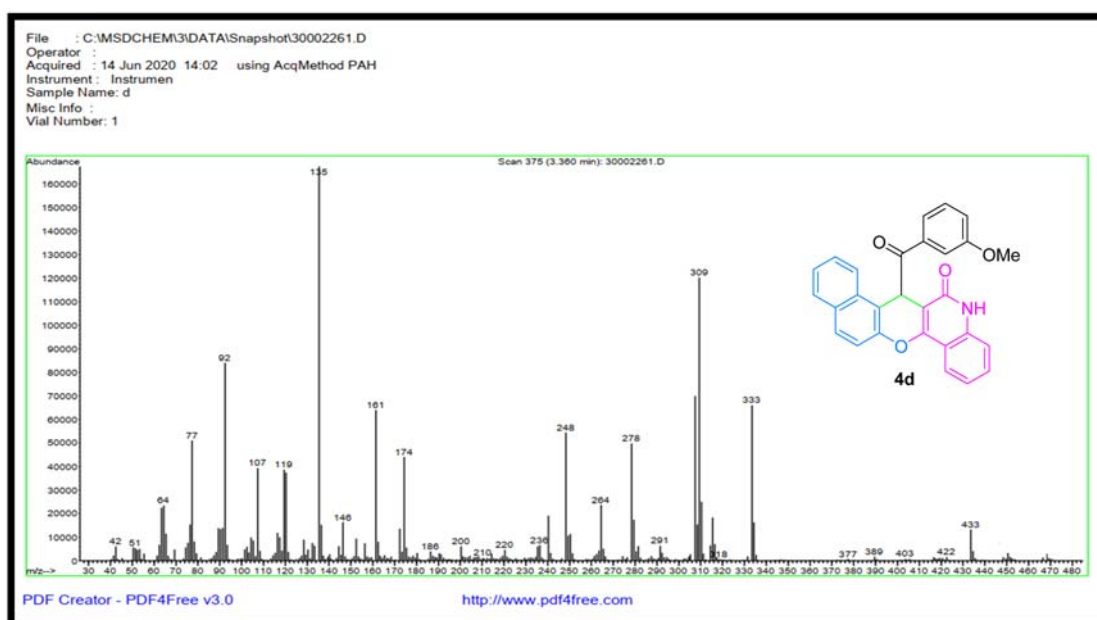

Figure S15: Mass spectrum of compound 4d.



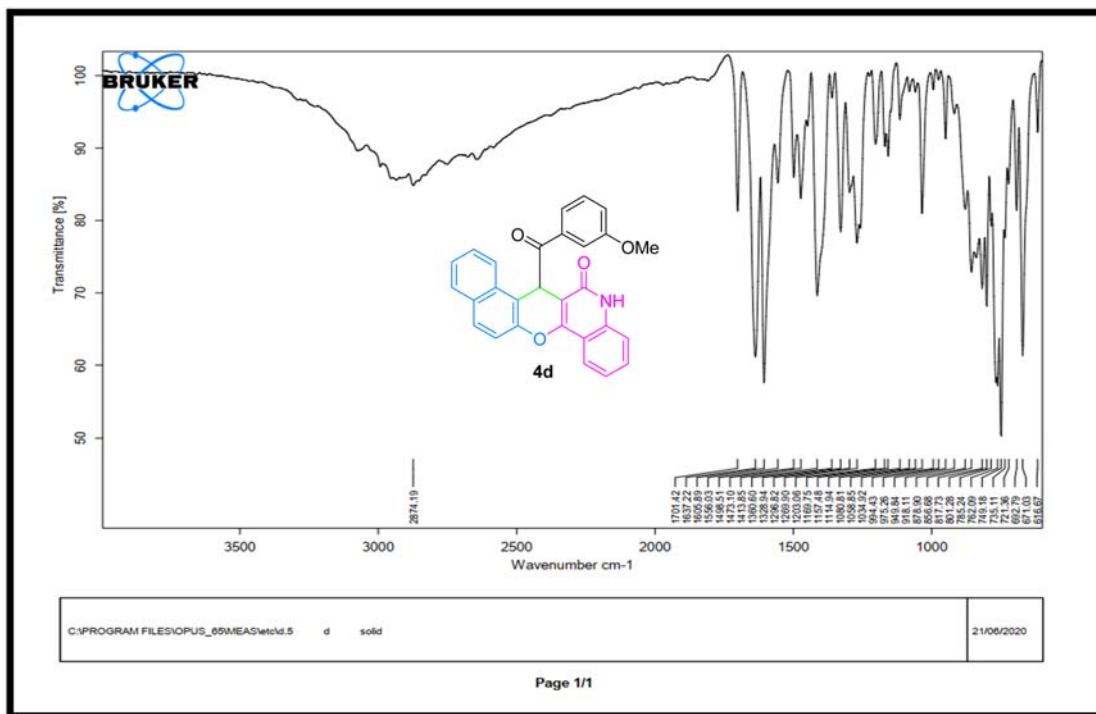

Figure S16: IR spectrum of compound 4d.

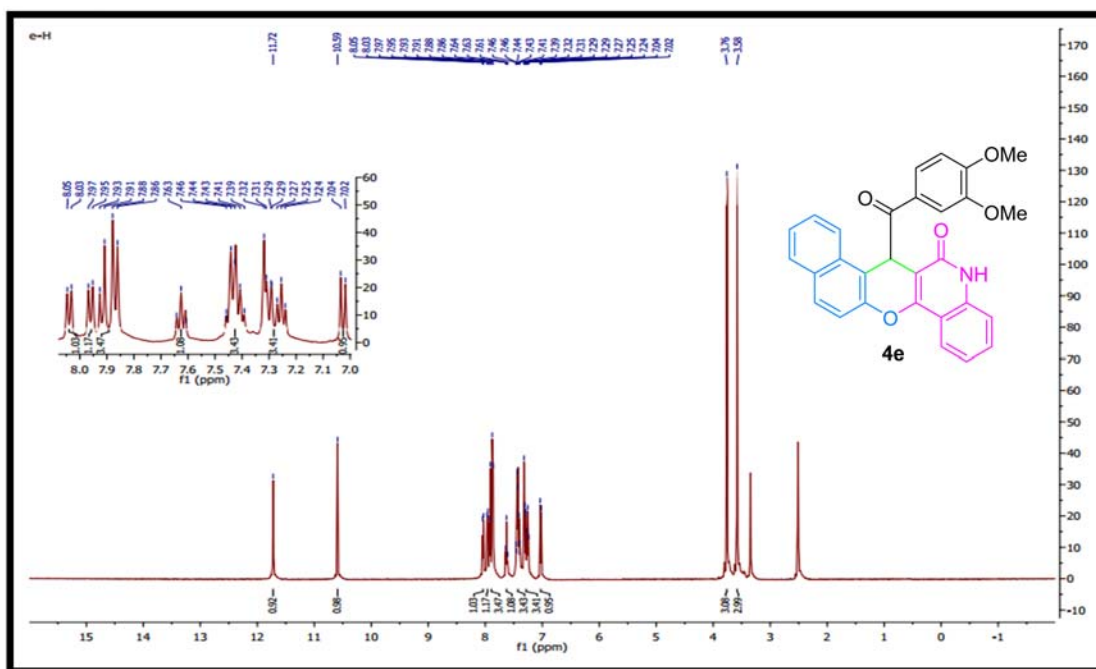Figure S17: <sup>1</sup>H NMR spectrum of compound 4e.

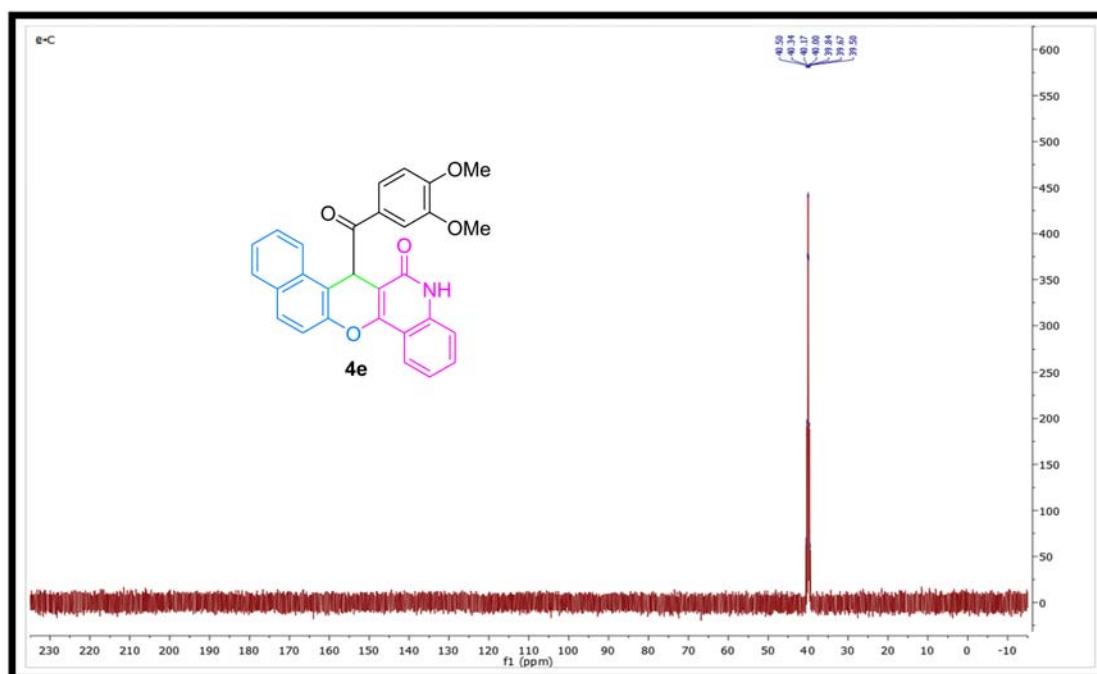

Figure S18:  $^{13}\text{C}$  NMR spectrum of compound **4e**.

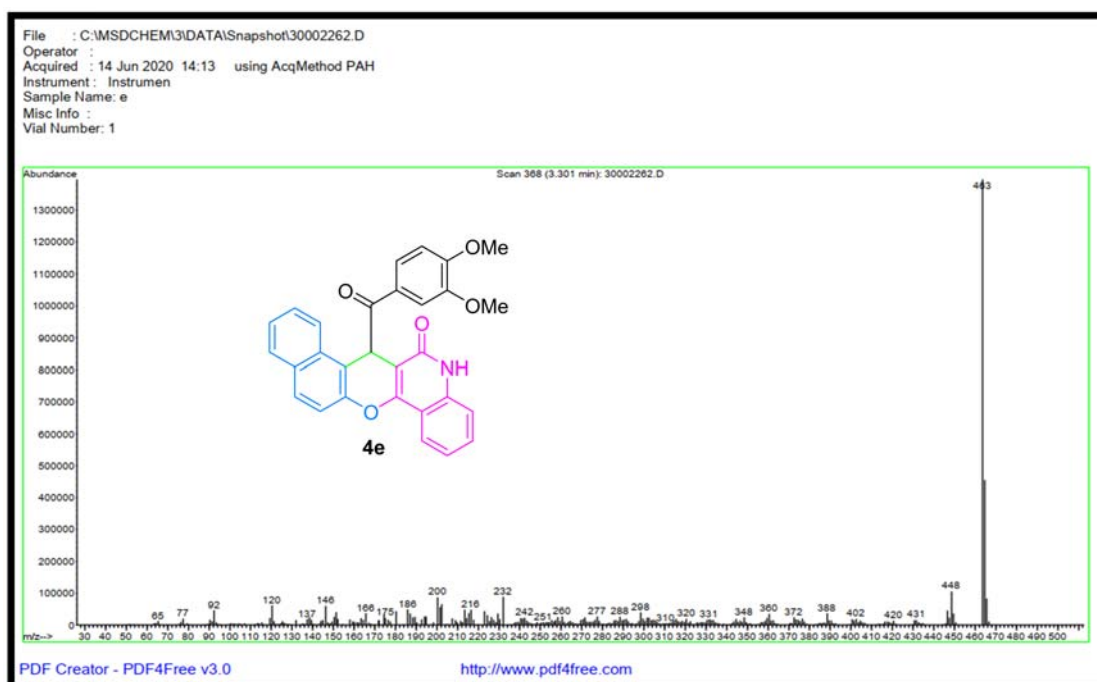

Figure S19: Mass spectrum of compound **4e**.

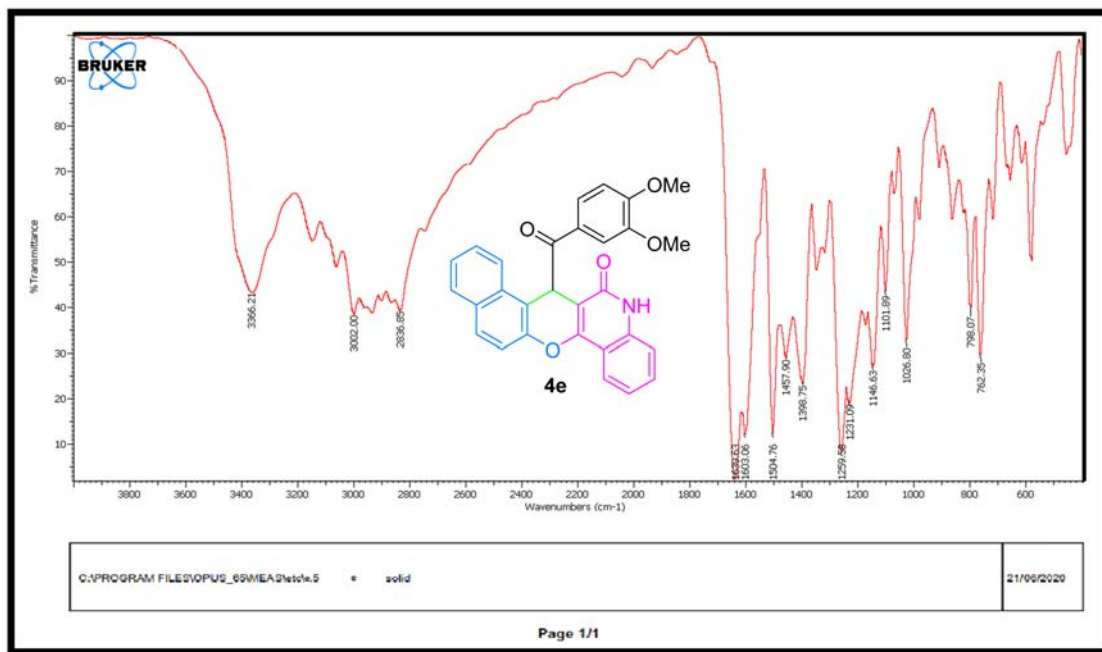

Figure S20: IR spectrum of compound 4e.

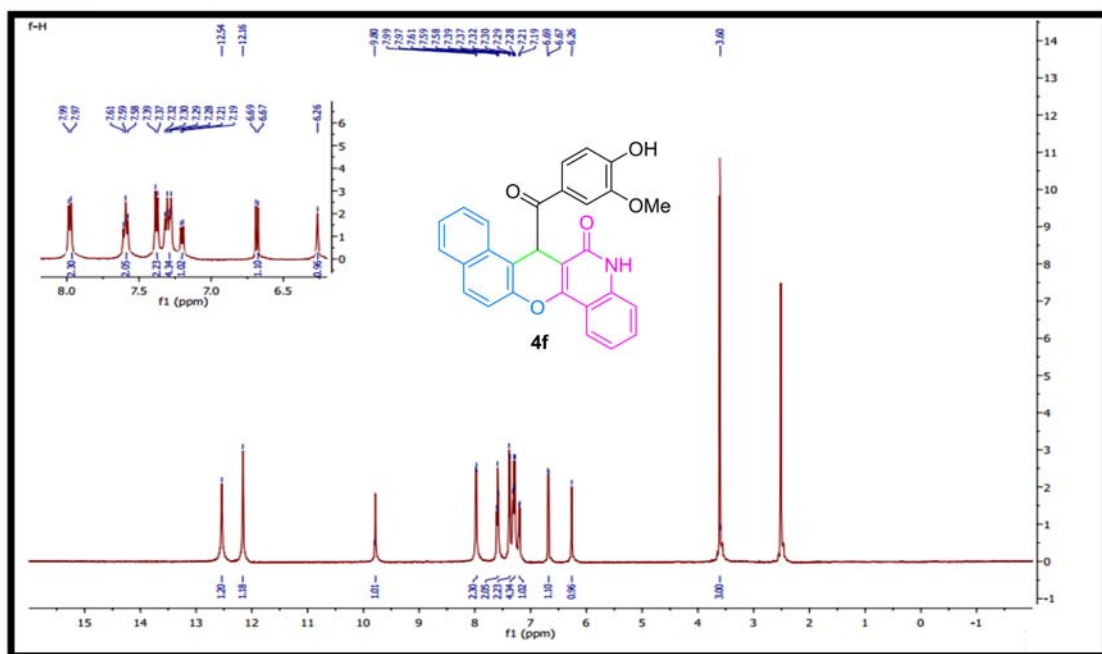Figure S21: <sup>1</sup>H NMR spectrum of compound 4f.

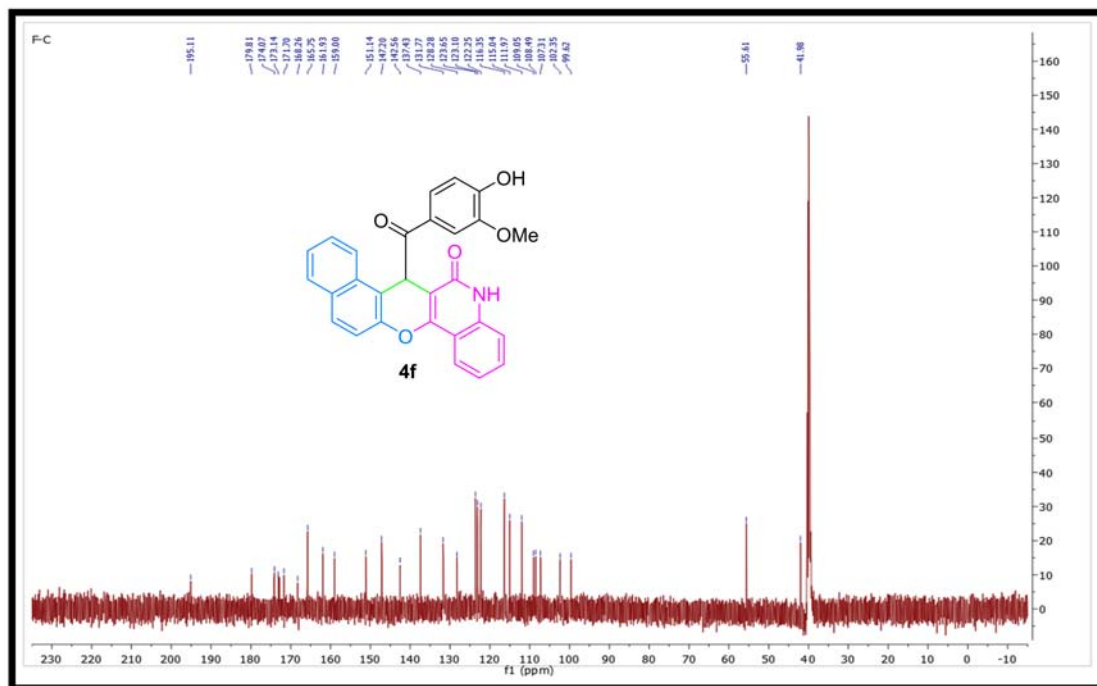Figure S22:  $^{13}\text{C}$  NMR spectrum of compound **4f**.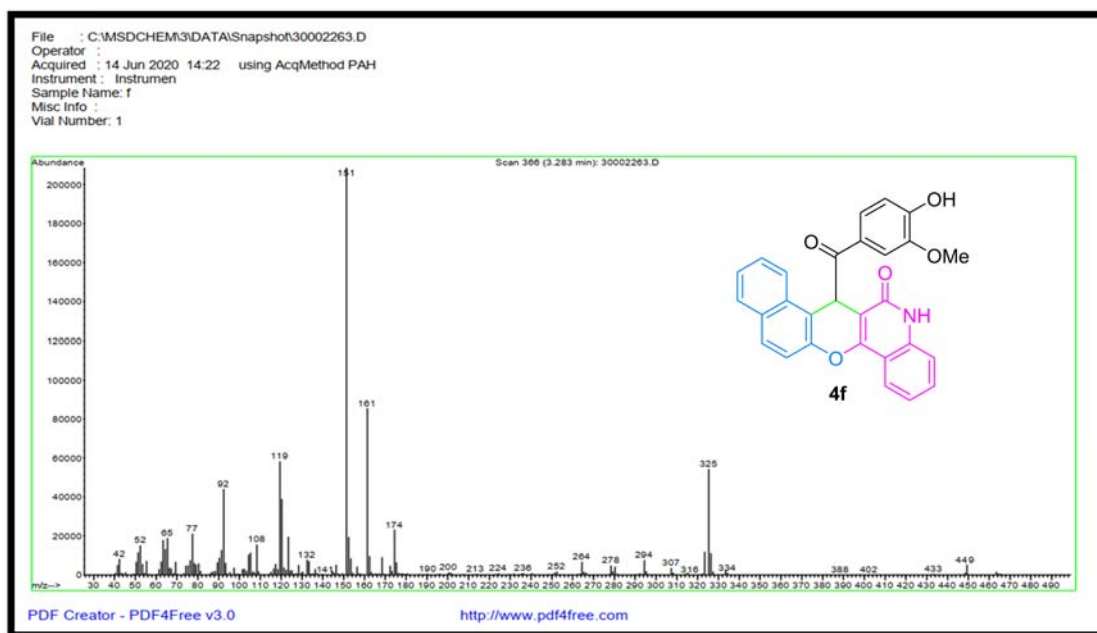Figure S23: Mass spectrum of compound **4f**.

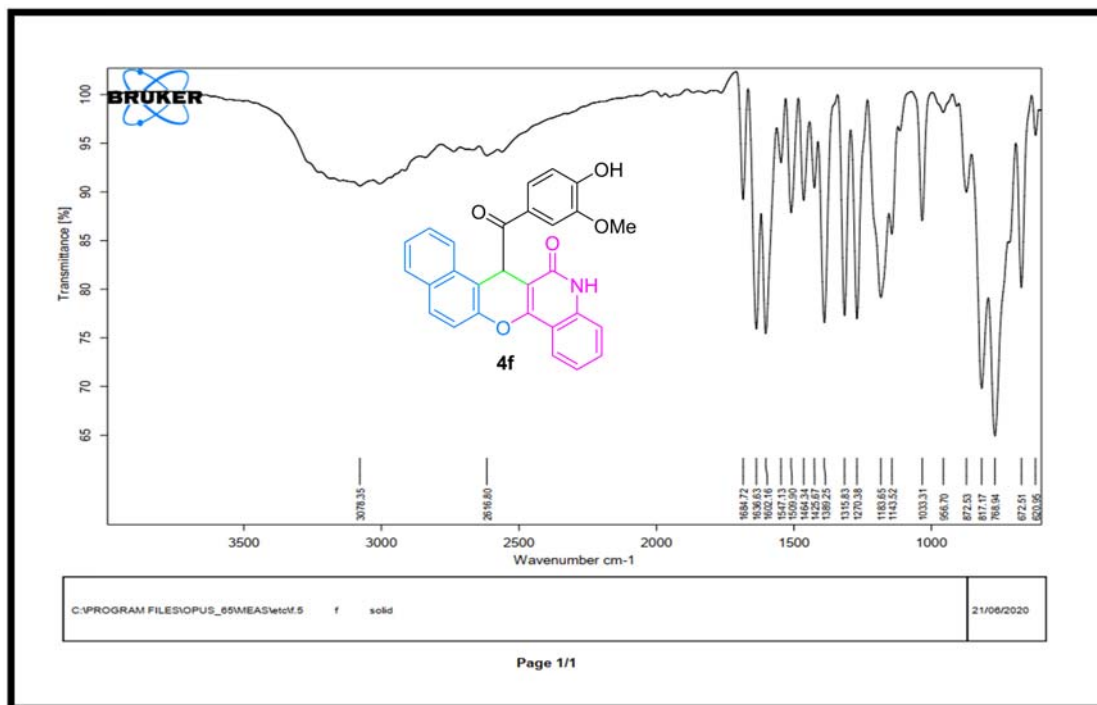

Figure S24: IR spectrum of compound 4f.

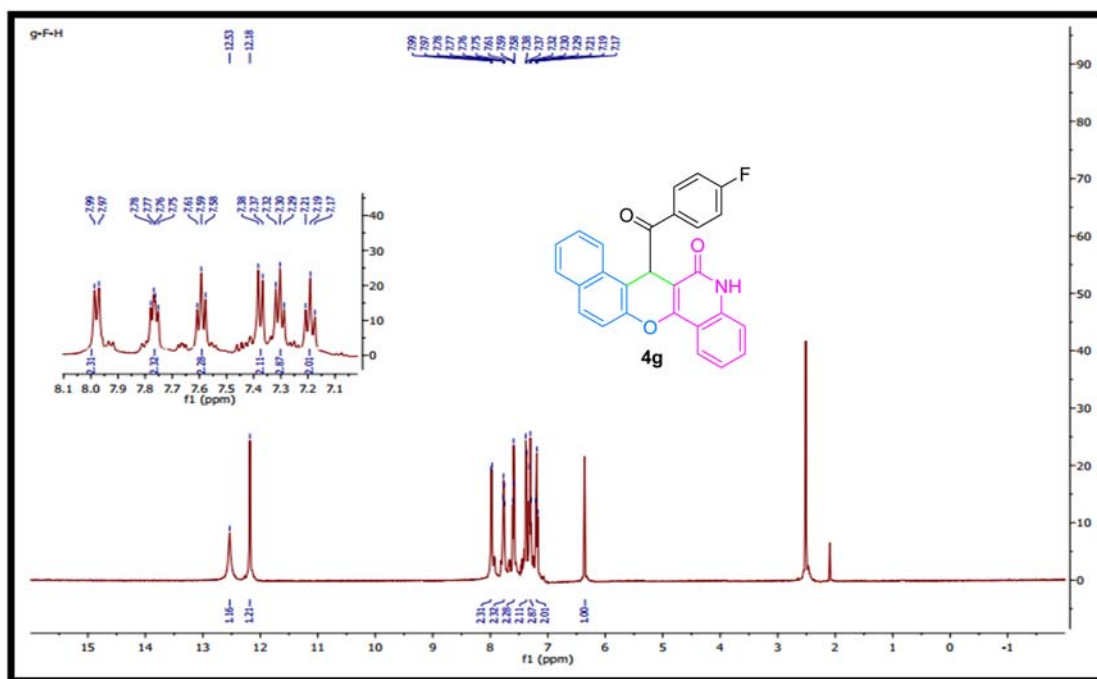

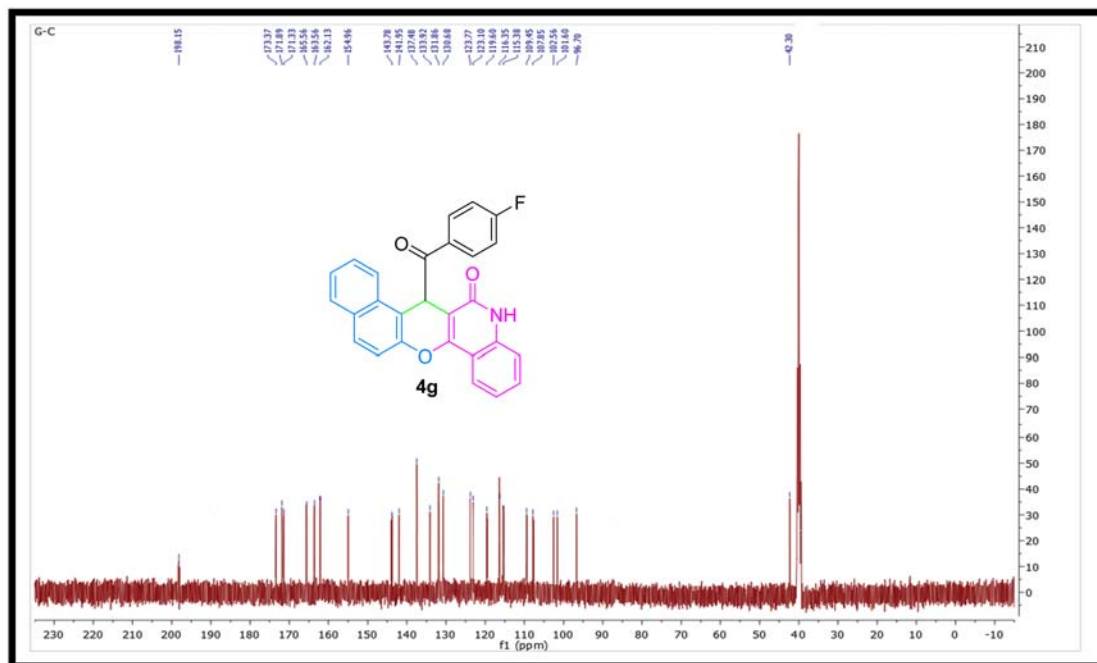Figure S26:  $^{13}\text{C}$  NMR spectrum of compound **4g**.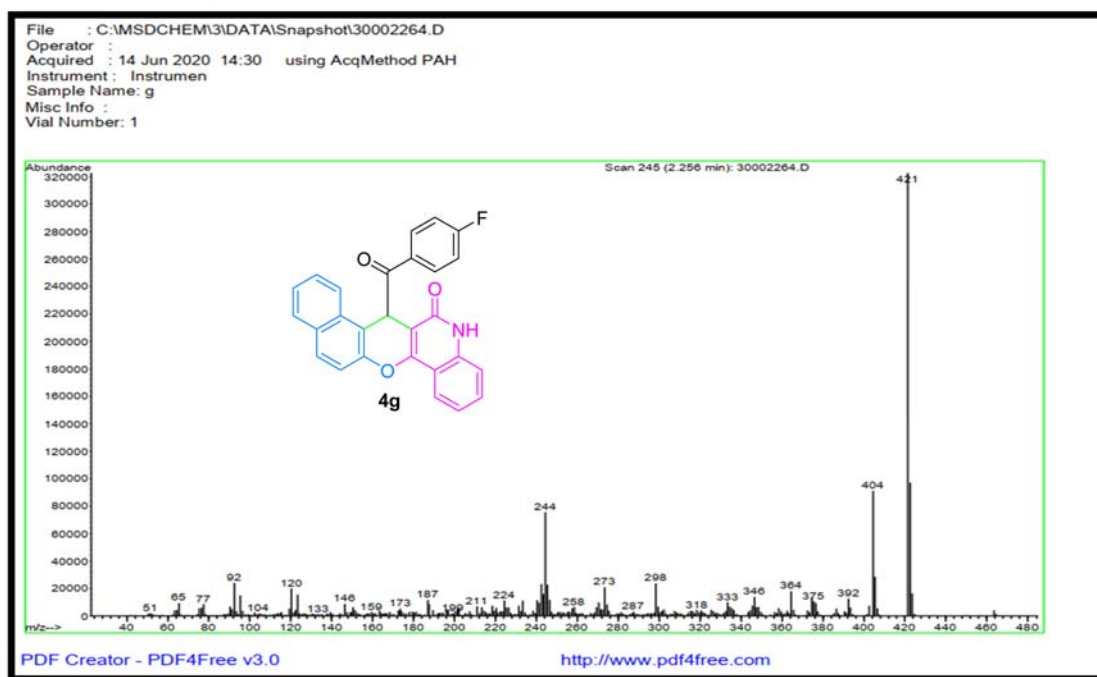Figure S27: Mass spectrum of compound **4g**.

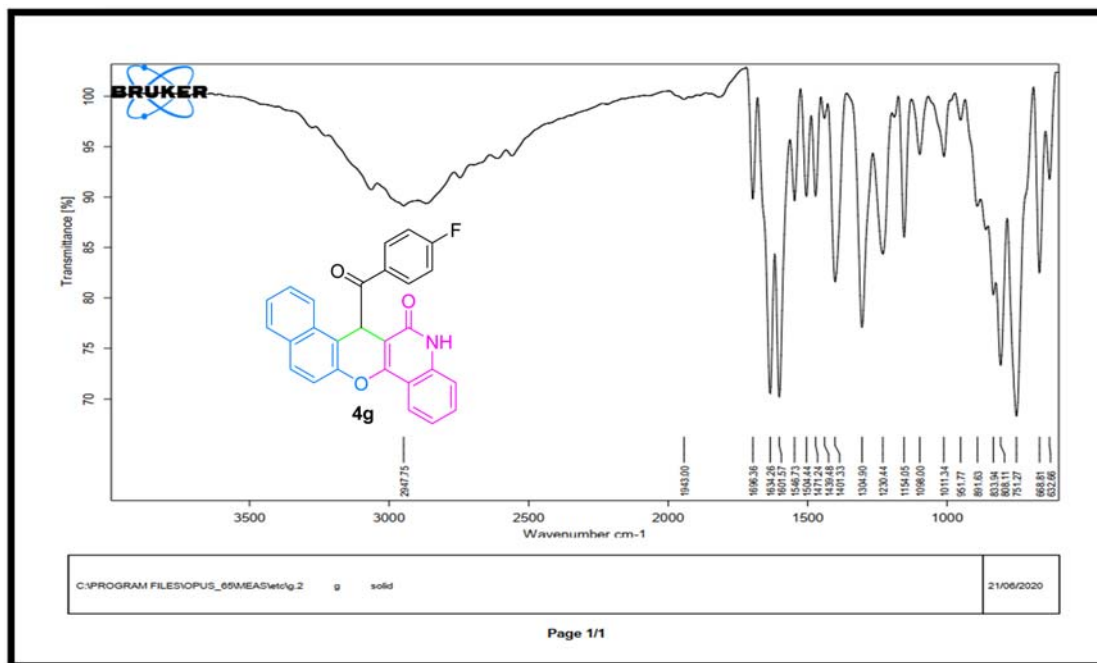Figure S28: IR spectrum of compound **4g**.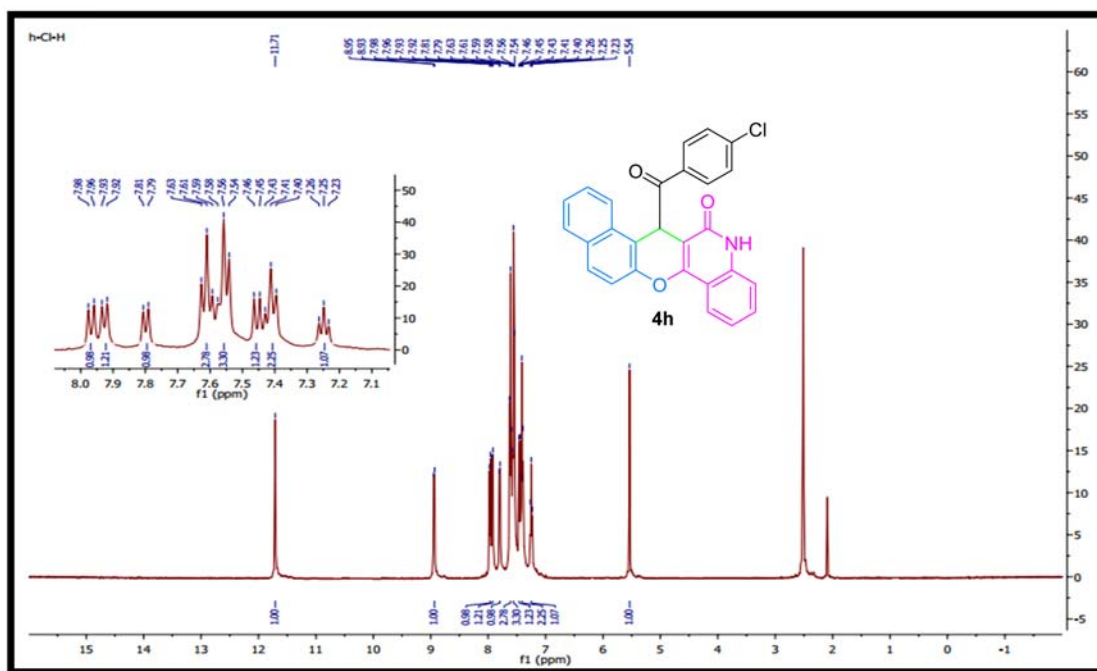Figure S29: <sup>1</sup>H NMR spectrum of compound **4h**.



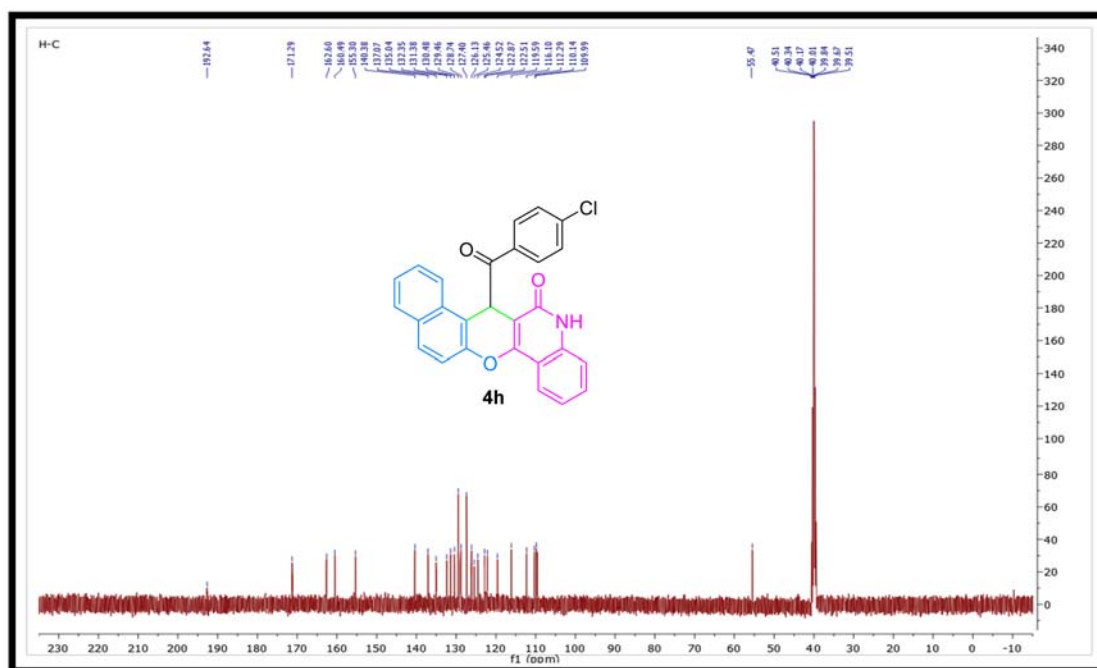Figure S30:  $^{13}\text{C}$  NMR spectrum of compound 4h.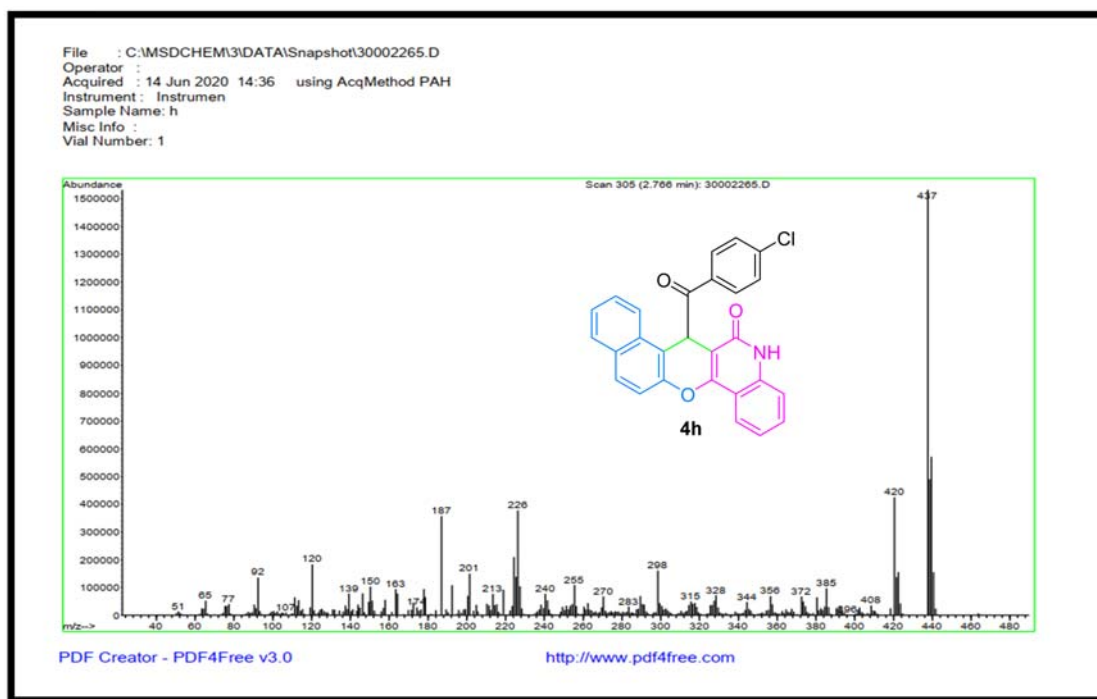

Figure S31: Mass spectrum of compound 4h.



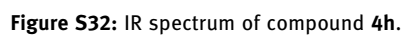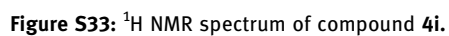

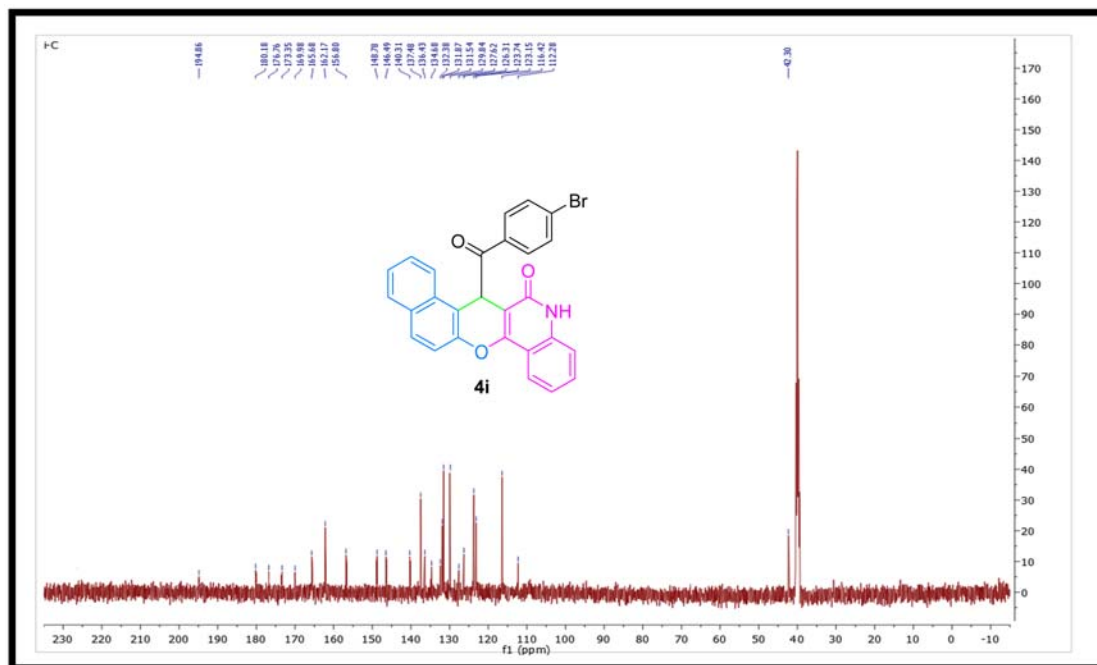

Figure S34:  $^{13}\text{C}$  NMR spectrum of compound **4i**.

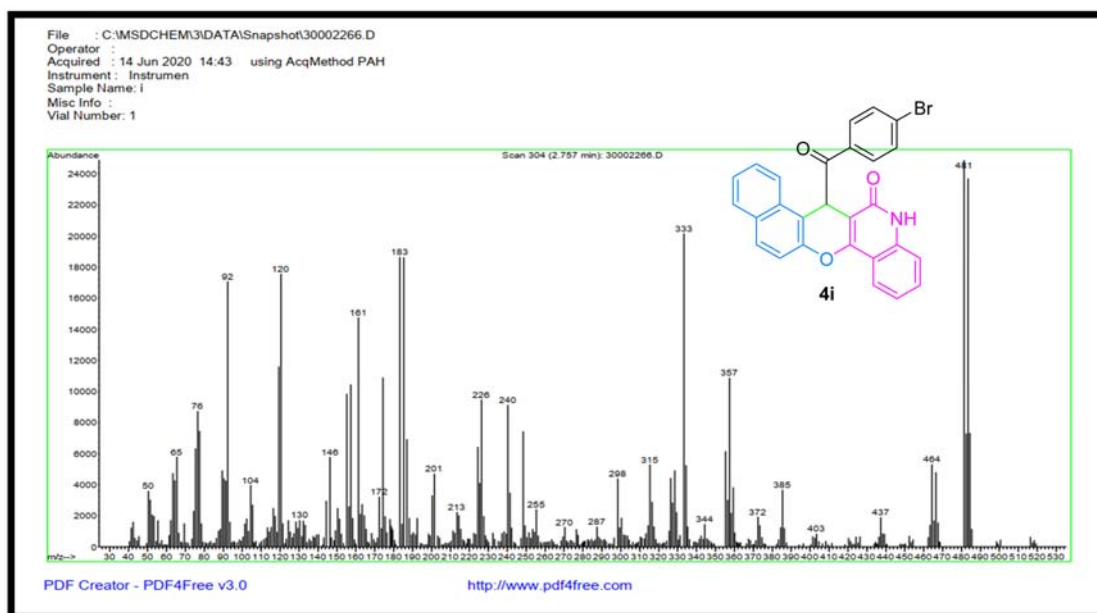

Figure S35: Mass spectrum of compound **4i**.

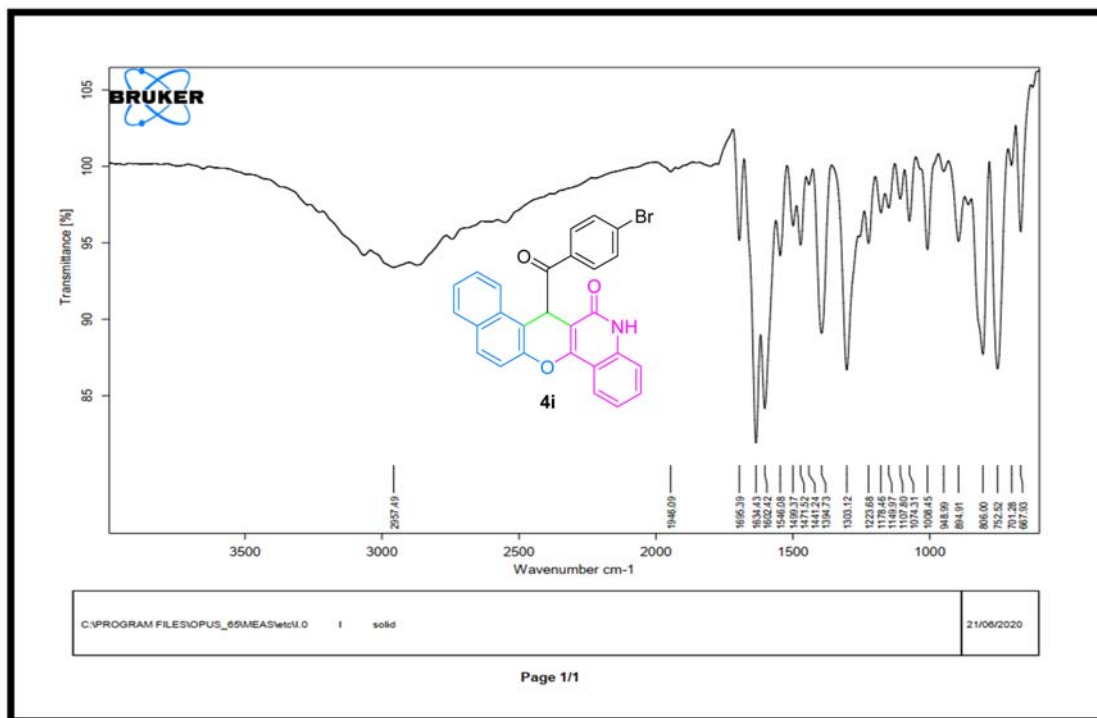

Figure S36: IR spectrum of compound 4i.

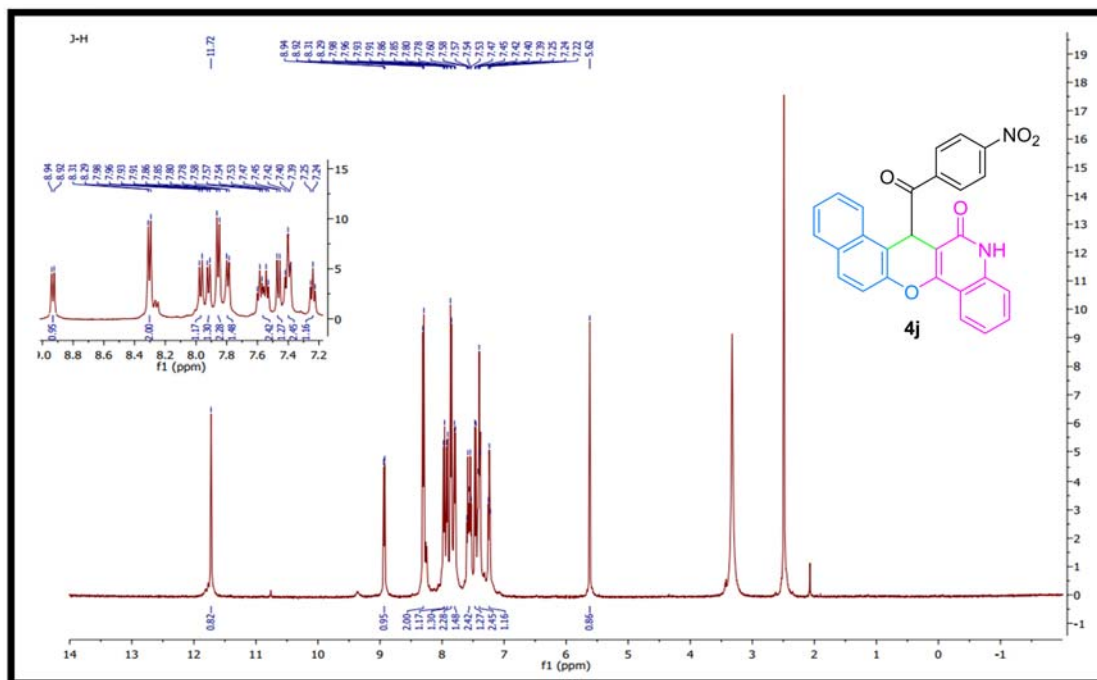Figure S37: <sup>1</sup>H NMR spectrum of compound 4j.

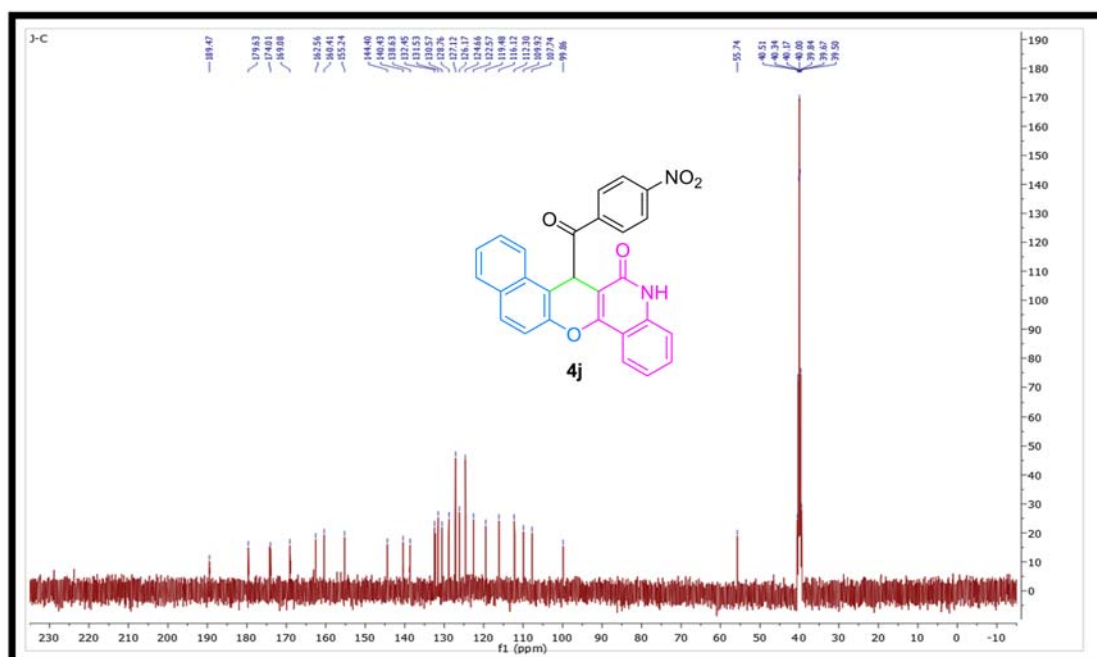

Figure S38:  $^{13}\text{C}$  NMR spectrum of compound **4j**.

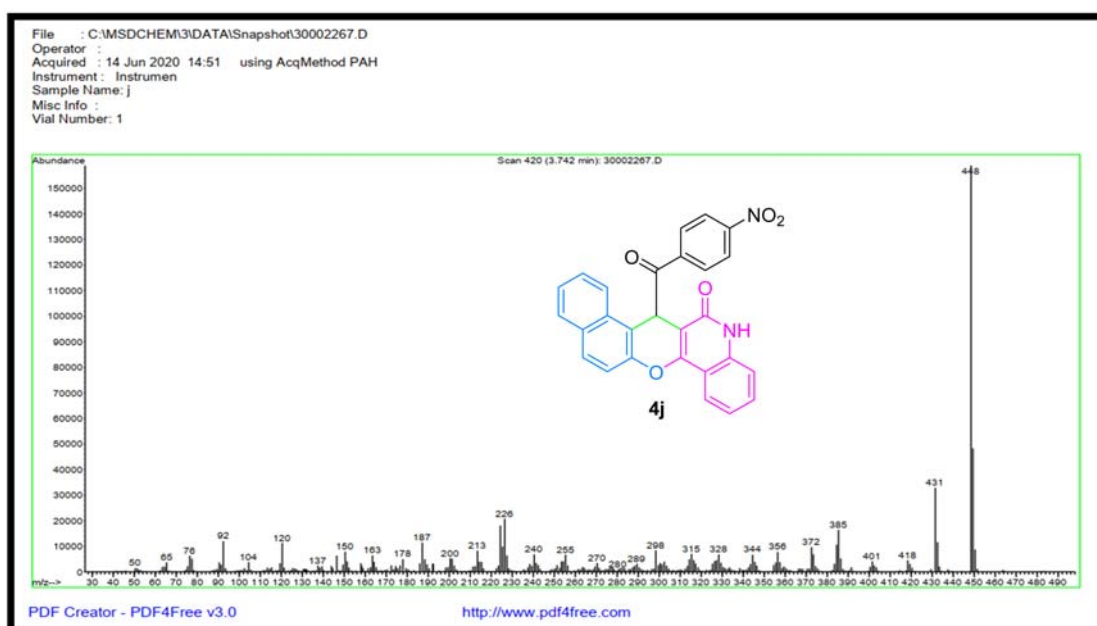

Figure S39: Mass spectrum of compound **4j**.

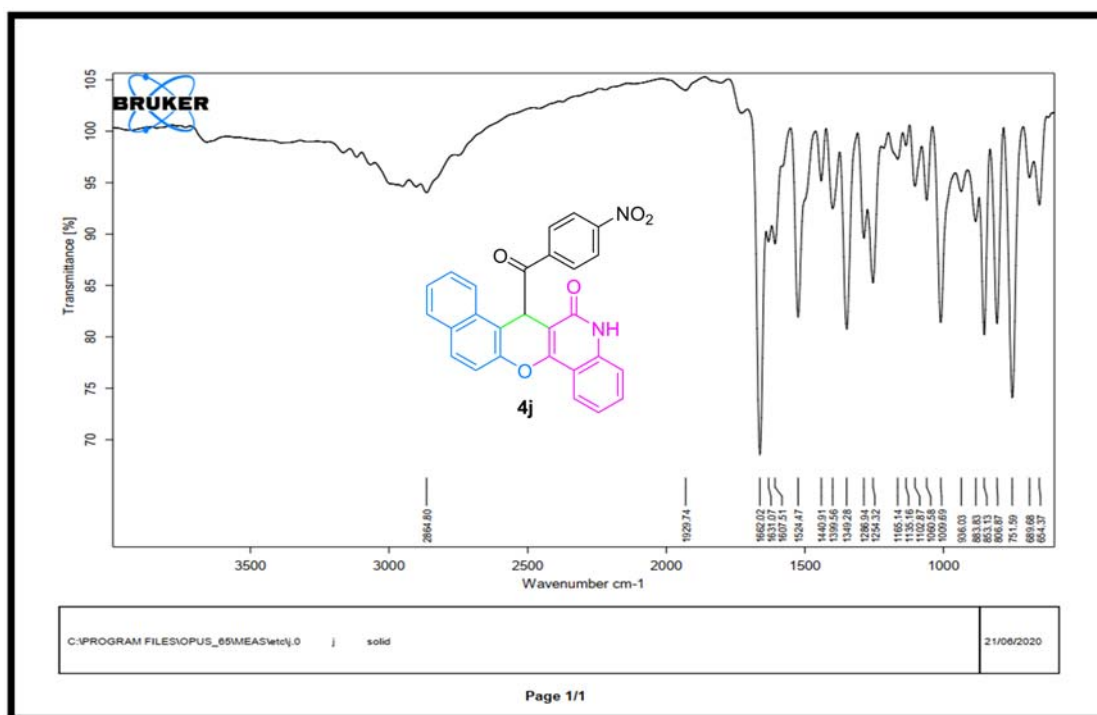

Figure S40: IR spectrum of compound 4j.
